# Supplementary material for: Total Fatty Acid and Polar Lipid Species Composition of Human Milk
Source: MDPI journal article supplement (doi:10.3390/nu14010158), 2021-12-29
Supplement: s1 [file s1]

**Supplemental Table S1.** Characteristics of study population (n=789, HUMIS cohort).

| Characteristic                                               | N   | Mean  | SD   | Min   | Max   |
|--------------------------------------------------------------|-----|-------|------|-------|-------|
| Maternal age at pregnancy starts (years)                     | 789 | 29.6  | 4.7  | 16.0  | 43.0  |
| Maternal height (cm)                                         | 777 | 167.3 | 6.2  | 149.0 | 199.0 |
| Pre-pregnancy BMI (kg/m <sup>2</sup> )                       | 761 | 25.0  | 4.8  | 16.4  | 47.9  |
| Gestational weight gain (kg)                                 | 756 | 15.1  | 6.0  | -7.0  | 38.0  |
| Total fatty fish dinners in one-year (servings) <sup>1</sup> | 731 | 26.0  | 28.2 | 0     | 282.3 |

<sup>1</sup>Defined as total fatty fish dinners in past year.

**Supplemental Table S2.** Percentages of the major PC species in all samples and comparison of the percentages between the lowest and highest-fat quartiles.

| %PCs                                      | Total sample<br>(n=664) | Lowest FA<br>quartile<br>(n=166) | Highest FA<br>quartile<br>(n=166) | <i>p</i> -value                |
|-------------------------------------------|-------------------------|----------------------------------|-----------------------------------|--------------------------------|
| presumably containing only saturated FAs  |                         |                                  |                                   |                                |
| PCaa.C32:0 (16:0/16:0)                    | 14.77±3.72              | 15.33±3.82                       | 14.47±3.26                        | 0.026                          |
| PCaa.C34:0(16:0/18:0)                     | 13.52±4.65              | 14.20±4.70                       | 13.02±4.41                        | 0.019                          |
| PCaa.C36:0 (18:0/18:0)                    | 0.53±0.20               | 0.56±0.23                        | 0.50±0.17                         | 0.004                          |
| presumably containing monounsaturated FAs |                         |                                  |                                   |                                |
| PCaa.C32:1 (16:0/16:1)                    | 1.29±0.39               | 1.28±0.35                        | 1.29±0.29                         | 0.723                          |
| PCaa.C34:1 (16:0/18:1)                    | 11.00±2.15              | 10.66±2.19                       | 11.38±1.94                        | 0.002                          |
| PCaa.C36:1 (18:0/18:1)                    | 6.30±1.15               | 6.41±1.27                        | 6.35±1.13                         | 0.612                          |
| PCaa.C38:1 (20:0/18:1)                    | 0.59±0.40               | 0.60±0.40                        | 0.56±0.37                         | 0.315                          |
| presumably containing polyunsaturated FAs |                         |                                  |                                   |                                |
| PCaa.C34:2 (16:0/18:2)                    | 6.97±1.96               | 6.46±1.91                        | 7.35±1.96                         | <b>3.90 × 10<sup>-4</sup>*</b> |
| PCaa.C36:2 (18:0/18:2)                    | 25.22±5.47              | 24.60±5.40                       | 25.88±4.80                        | 0.024                          |
| PCaa.C38:2 (20:0/18:2)                    | 2.00±0.82               | 2.07±0.81                        | 1.90±0.60                         | 0.028                          |
| PCaa.C38:3 (20:0/18:3)                    | 1.75±0.44               | 1.76±0.46                        | 1.75±0.37                         | 0.806                          |
| PCaa.C36:3 (18:0/18:3)                    | 2.37±0.86               | 2.12±0.80                        | 2.60±0.80                         | <b>1.00 × 10<sup>-6</sup>*</b> |
| presumably containing LCPUFAs             |                         |                                  |                                   |                                |
| PCaa.C36:4 (16:0/20:4)                    | 0.58±0.26               | 0.50±0.23                        | 0.64±0.22                         | <b>2.56 × 10<sup>-8</sup>*</b> |
| PCaa.C38:4 (18:0/20:4)                    | 1.38±0.36               | 1.32±0.37                        | 1.44±0.34                         | 0.002                          |

\*Significant with a Bonferroni adjusted *p*-value≤0.001. Data presented as mean±SD. Values are expressed as mol% of total phosphatidylcholine. PCs: phosphatidylcholine species, FA: fatty acid, LCPUFAs: long chain polyunsaturated FAs.

**Supplemental Table S3.** Percentages of the major SM species in all samples and comparison of the percentages between the lowest and highest FA quartiles.

| %SM                                   | Total sample<br>(n=664) | Lowest FA<br>quartile<br>(n=166) | Highest FA<br>quartile<br>(n=166) | p-value                        |
|---------------------------------------|-------------------------|----------------------------------|-----------------------------------|--------------------------------|
| presumably containing saturated FAs   |                         |                                  |                                   |                                |
| SM.C32:1(18:1/14:0)                   | 0.81±0.29               | 0.85±0.29                        | 0.79±0.26                         | 0.048                          |
| SM.C34:1(18:1/16:0)                   | 7.93±1.50               | 8.40±1.70                        | 7.62±1.36                         | <b>9.00 × 10<sup>-6*</sup></b> |
| SM.C35:1(18:1/17:0)                   | 0.47±0.20               | 0.50±0.13                        | 0.44±0.11                         | <b>2.00 × 10<sup>-5*</sup></b> |
| SM.C36:1(18:1/18:0)                   | 11.19±2.07              | 11.36±2.21                       | 11.12±1.93                        | 0.294                          |
| SM.C37:1(18:1/19:0)                   | 0.52±0.14               | 0.54±0.14                        | 0.50±0.13                         | 0.021                          |
| SM.C38:1(18:1/20:0)                   | 5.60±0.77               | 5.60±0.71                        | 5.60±0.73                         | 0.928                          |
| SM.C39:1(18:1/21:0)                   | 0.86±0.54               | 0.85±0.16                        | 0.81±0.16                         | 0.013                          |
| SM.C40:1(18:1/22:0)                   | 31.22±5.80              | 30.90±5.76                       | 31.65±5.61                        | 0.226                          |
| SM.C41:1(18:1/23:0)                   | 3.94±0.58               | 3.91±0.63                        | 3.94±0.53                         | 0.557                          |
| SM.C42:1(18:1/24:0)                   | 16.39±2.69              | 15.97±2.63                       | 16.76±2.77                        | 0.008                          |
| SM.C43:1(18:1/25:0)                   | 0.50±0.09               | 0.50±0.09                        | 0.50±0.09                         | 0.916                          |
| presumably containing unsaturated FAs |                         |                                  |                                   |                                |
| SM.C36:2(18:1/18:1)                   | 0.72±0.22               | 0.77±0.24                        | 0.69±0.21                         | 0.005                          |
| SM.C38:2(18:1/20:1)                   | 0.53±0.20               | 0.52±0.14                        | 0.53±0.14                         | 0.568                          |
| SM.C40:2(18:1/22:1)                   | 2.00±0.45               | 1.93±0.40                        | 2.05±0.46                         | 0.008                          |
| SM.C41:2(18:1/23:1)                   | 0.80±0.20               | 0.86±0.21                        | 0.76±0.18                         | <b>7.00 × 10<sup>-5*</sup></b> |
| SM.C42:2(18:1/24:1)                   | 10.70±2.59              | 10.90±2.43                       | 10.61±2.39                        | 0.348                          |
| SM.C43:2(18:1/25:1)                   | 0.50±0.53               | 0.51±0.13                        | 0.50±0.12                         | 0.012                          |
| SM.C42:3(18:1/24:2)                   | 1.01±0.62               | 1.03±0.26                        | 0.99±0.25                         | 0.089                          |

\*Significant with Bonferroni adjusted p-value≤0.001. Data presented as mean±SD. Values are expressed as mol% of total sphingomyelin (SM)

**Supplemental Table S4.** Regression of LCPUFAs containing %PCs with % FAs in the lowest and highest-FA quartiles.

| Total FA                    | Dependent Variable (% PCs) | Independent Variable (%FAs) | R²    | B (95%CI)              | β            | p-value                        |
|-----------------------------|----------------------------|-----------------------------|-------|------------------------|--------------|--------------------------------|
| Lowest-FA Quartile(n=166)   |                            |                             |       |                        |              |                                |
| %PCaa.C36:4                 |                            |                             | 0.095 |                        |              |                                |
|                             |                            | %C16:0                      |       | 0.009(0.003 - 0.016)   | 0.217        | 0.004                          |
| %PCaa.C38:4                 |                            | %C20:4n-6                   |       | 0.215(0.058 - 0.372)   | 0.202        | 0.008                          |
|                             |                            | %C18:0                      | 0.162 | -0.009(-0.024 - 0.007) | -0.079       | 0.277                          |
| %PCaa.C36:5                 |                            | %C20:4n-6                   |       | 0.694(0.431 - 0.956)   | <b>0.380</b> | <b>5.46 × 10<sup>-7</sup></b>  |
|                             |                            | %C16:0                      | 0.244 | 0.001(0.000 - 0.002)   | 0.182        | 0.008                          |
| %PCaa.C38:5                 |                            | %C20:5n-3                   |       | 0.071(0.051 – 0.092)   | <b>0.470</b> | <b>1.19 × 10<sup>-10</sup></b> |
|                             |                            | %C18:0                      | 0.256 | -0.003(-0.008 – 0.001) | -0.103       | 0.131                          |
| %PCaa.C38:6                 |                            | %C20:5n-3                   |       | 0.242(0.176 – 0.309)   | <b>0.486</b> | <b>2.67*10<sup>-11</sup></b>   |
|                             |                            | %C16:0                      | 0.226 | 0.004(0.001 – 0.006)   | 0.223        | 0.001                          |
| %PCaa.C40:6                 |                            | %C22:6n-3                   |       | 0.049(0.034 – 0.065)   | <b>0.430</b> | <b>3.72 × 10<sup>-9</sup></b>  |
|                             |                            | %C18:0                      | 0.180 | -0.002(-0.007 – 0.004) | -0.047       | 0.512                          |
|                             |                            | %C22:6n-3                   |       | 0.078(0.051 – 0.104)   | <b>0.417</b> | <b>2.88 × 10<sup>-8</sup></b>  |
| Highest-FA quartile (n=166) |                            |                             |       |                        |              |                                |
| %PCaa.C36:4                 |                            |                             | 0.100 |                        |              |                                |
|                             |                            | %C16:0                      |       | 0.007(-0.001 – 0.016)  | 0.127        | 0.090                          |
| %PCaa.C38:4                 |                            | %C20:4n-6                   |       | 0.390(0.200 – 0.581)   | <b>0.302</b> | <b>8.10 × 10<sup>-5</sup></b>  |
|                             |                            | %C18:0                      | 0.148 | -0.007(-0.024 – 0.010) | -0.061       | 0.406                          |
| %PCaa.C36:5                 |                            | %C20:4n-6                   |       | 0.745(0.456 – 1.035)   | <b>0.371</b> | <b>1.00 × 10<sup>-5</sup></b>  |
|                             |                            | %C16:0                      | 0.289 | 0.000(-0.001 – 0.001)  | 0.042        | 0.522                          |
| %PCaa.C38:5                 |                            | %C20:5n-3                   |       | 0.083(0.062 – 0.103)   | <b>0.534</b> | <b>1.48 × 10<sup>-13</sup></b> |
|                             |                            | %C18:0                      | 0.431 | -0.002(-0.005 – 0.002) | -0.058       | 0.328                          |
| %PCaa.C38:6                 |                            | %C20:5n-3                   |       | 0.338(0.277 – 0.399)   | <b>0.649</b> | <b>2.76 × 10<sup>-21</sup></b> |
|                             |                            | %C16:0                      | 0.538 | 0.004(0.001 – 0.006)   | 0.210        | 0.002                          |
| %PCaa.C40:6                 |                            | %C22:6n-3                   |       | 0.068(0.051 – 0.086)   | <b>0.503</b> | <b>2.01 × 10<sup>-12</sup></b> |
|                             |                            | %C18:0                      | 0.301 | -0.004(-0.010 – 0.001) | -0.105       | 0.114                          |
|                             |                            | %C22:6n-3                   |       | 0.127(0.095 – 0.159)   | <b>0.523</b> | <b>3.81 × 10<sup>-13</sup></b> |

%PCaa: %diacyl-phosphatidylcholine, %FAs: % fatty acids, R<sup>2</sup>: coefficient of determination, B(%CI): Unstandardized coefficient with 95%confidence interval, β: standardized regression coefficient.
